# Supplementary material for: A self-assembled octanuclear complex bearing the uncommon close-packed {Fe4Mn4(μ4-O)4(μ-O)4} molecular core
Source: Royal Society of Chemistry journal article supplement (doi:10.1039/c5dt02076j), 2015-01-01
Supplement: c5dt02076j1.pdf [file c5dt02076j1.pdf]

## Electronic Supplementary Information

### **Self-Assembled Octanuclear Complex Bearing the Uncommon Close-Packed $\{\text{Fe}_4\text{Mn}_4(\mu_4\text{-O})_4(\mu\text{-O})_4\}$ Molecular Core**

Oksana V. Nesterova,<sup>a</sup> Eduard N. Chygorin,<sup>b</sup> Vladimir N. Kokozay,<sup>\*b</sup> Irina V. Omelchenko<sup>c</sup>, Oleg V. Shishkin<sup>c</sup>, Roman Boča<sup>d</sup> and Armando J. L. Pombeiro<sup>\*a</sup>

<sup>a</sup> *Centro de Química Estrutural, Instituto Superior Técnico, Universidade de Lisboa, Avenida Rovisco Pais, 1049-001 Lisboa, Portugal. E-mail: pombeiro@tecnico.ulisboa.pt*

<sup>b</sup> *Department of Inorganic Chemistry, Taras Shevchenko National University of Kyiv, Volodymyrska str. 64/13, Kyiv 01601, Ukraine. E-mail: kokozay@univ.kiev.ua*

<sup>c</sup> *STC "Institute for Single Crystals" National Academy of Sciences of Ukraine, 60, Lenina Avenue, Kharkiv 61001, Ukraine*

<sup>d</sup> *Department of Chemistry, FPV, University of SS Cyril and Methodius, Trnava, Slovakia*

**Table S1.** Selected geometrical parameters (distances/Å and angles/°) for **1**

---

|                          |          |                         |          |
|--------------------------|----------|-------------------------|----------|
| Fe1–O2                   | 1.933(5) | Mn3–O5                  | 2.256(5) |
| Fe1–O5                   | 1.964(4) | Mn3–O6                  | 1.920(5) |
| Fe1–O11                  | 2.026(4) | Mn3–O7                  | 1.873(5) |
| Fe1–O12                  | 1.975(4) | Mn3–O9                  | 2.197(6) |
| Fe1–O12 <sup>a</sup>     | 2.202(4) | Mn3–O12                 | 1.871(4) |
| Fe1–N3                   | 2.143(6) | Mn3–N4                  | 2.071(6) |
| Fe2–O3                   | 1.949(5) | Mn4–O1                  | 1.874(5) |
| Fe2–O8                   | 1.921(5) | Mn4–O3                  | 2.279(5) |
| Fe2–O11                  | 2.265(5) | Mn4–O4                  | 1.905(5) |
| Fe2–O11 <sup>a</sup>     | 1.959(4) | Mn4–O10                 | 2.167(7) |
| Fe2–O12                  | 2.026(5) | Mn4–O11                 | 1.865(4) |
| Fe2–N2                   | 2.157(6) | Mn4–N1                  | 2.079(6) |
|                          |          |                         |          |
| O2–Fe1–O5                | 99.7(2)  | O5–Mn3–O7               | 95.5(2)  |
| O2–Fe1–O11               | 89.3(2)  | O5–Mn3–O9               | 169.5(2) |
| O2–Fe1–O12               | 161.4(2) | O5–Mn3–O12              | 77.4(2)  |
| O2–Fe1–O12 <sup>a</sup>  | 107.0(2) | O5–Mn3–N4               | 88.5(2)  |
| O2–Fe1–N3                | 90.2(2)  | O6–Mn3–O5 <sup>a</sup>  | 94.3(2)  |
| O5–Fe1–O11               | 114.5(2) | O6–Mn3–O9 <sup>a</sup>  | 91.8(2)  |
| O5–Fe1–O12               | 76.9(2)  | O6–Mn3–N4 <sup>a</sup>  | 176.4(2) |
| O5–Fe1–O12 <sup>a</sup>  | 149.2(2) | O7–Mn3–O6 <sup>a</sup>  | 92.6(2)  |
| O5–Fe1–N3                | 83.8(2)  | O7–Mn3–O9               | 92.8(2)  |
| O11–Fe1–O12              | 75.9(2)  | O7–Mn3–O12              | 172.6(2) |
| O11–Fe1–N3               | 161.5(2) | O7–Mn3–N4               | 89.5(2)  |
| O12–Fe1–O11 <sup>a</sup> | 81.3(2)  | O9–Mn3–O12              | 94.0(2)  |
| O12–Fe1–O12 <sup>a</sup> | 82.2(2)  | O9–Mn3–N4               | 85.1(2)  |
| O12–Fe1–N3               | 107.4(2) | O12–Mn3–O6 <sup>a</sup> | 89.9(2)  |
| O12–Fe1–N3 <sup>a</sup>  | 81.2(2)  | O12–Mn3–N4              | 88.4(2)  |
| O3–Fe2–O8                | 99.2(2)  | O1–Mn4–O3 <sup>a</sup>  | 95.3(2)  |
| O3–Fe2–O11               | 149.6(2) | O1–Mn4–O4               | 93.8(2)  |
| O3–Fe2–O11 <sup>a</sup>  | 76.4(2)  | O1–Mn4–O10              | 94.5(2)  |
| O3–Fe2–O12               | 113.2(2) | O1–Mn4–O11              | 172.4(2) |
| O3–Fe2–N2                | 84.3(2)  | O1–Mn4–N1               | 89.4(2)  |
| O8–Fe2–O11               | 107.6(2) | O4–Mn4–O3 <sup>a</sup>  | 96.3(2)  |
| O8–Fe2–O11 <sup>a</sup>  | 159.9(2) | O4–Mn4–O10              | 93.7(2)  |
| O8–Fe2–O12               | 89.7(2)  | O4–Mn4–O11              | 89.8(2)  |
| O8–Fe2–N2                | 91.2(2)  | O4–Mn4–N1               | 175.9(2) |
| O11–Fe2–O11 <sup>a</sup> | 82.8(2)  | O10–Mn4–O3 <sup>a</sup> | 165.5(2) |
| O11–Fe2–O12              | 81.6(2)  | O10–Mn4–O11             | 92.0(2)  |
| O11–Fe2–N2               | 81.1(2)  | O10–Mn4–N1              | 83.6(2)  |
| O12–Fe2–O11 <sup>a</sup> | 74.6(2)  | O11–Mn4–O3 <sup>a</sup> | 77.6(2)  |
| O12–Fe2–N2               | 162.1(2) | O11–Mn4–N1              | 87.3(2)  |
| N2–Fe2–O11 <sup>a</sup>  | 107.6(2) | N1–Mn4–O3 <sup>a</sup>  | 85.9(2)  |

---

Symmetry transformations used to generate equivalent atoms: <sup>a</sup> 1–x, y, 1.5–z.
